# Supplementary material for: Early, very high-dose, and prolonged vitamin C administration in murine sepsis
Source: Springer Nature journal article supplement (doi:10.1038/s41598-025-02622-7), 2025-05-20

## **Supplementary Information**

### **Early, very high-dose, and prolonged vitamin C administration in murine sepsis**

*Scientific Reports*

Ok-Hyeon Kim<sup>1</sup>, Tae Wan Kim<sup>2</sup>, Hana Kang<sup>3</sup>, Tae Jin Jeon<sup>3</sup>, Eun Seo Chang<sup>3</sup>, Hyun Jung Lee<sup>1,3</sup>,  
and Won-Young Kim<sup>2</sup>

<sup>1</sup>Department of Anatomy and Cell Biology, Chung-Ang University College of Medicine, Seoul, Republic of Korea. <sup>2</sup>Division of Pulmonary and Critical Care Medicine, Department of Internal Medicine, Chung-Ang University Hospital, Chung-Ang University College of Medicine, Seoul, Republic of Korea. <sup>3</sup>Department of Global Innovative Drugs, Graduate School of Chung-Ang University, Seoul, Republic of Korea.

**Supplementary Appendix.** The ARRIVE Essential 10 guidelines 2.0.

**Supplementary Table S1.** Murine sepsis score.

**Supplementary Table S2.** Quantitative real-time PCR primer sequences.

**Supplementary Fig. S1.** Survival rate.

**Supplementary Fig. S2.** Time-dependent interleukin (IL)-6 level.

**Supplementary Fig. S3.** Full unedited gel images for Fig. 5D.

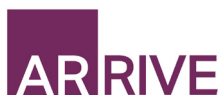

# The ARRIVE guidelines 2.0: author checklist

## The ARRIVE Essential 10

These items are the basic minimum to include in a manuscript. Without this information, readers and reviewers cannot assess the reliability of the findings.

| Item                                    | Recommendation                                                                                                                                                                                                                                                                                                                                                                                                                                                                                                                             | Section/line number, or reason for not reporting |
|-----------------------------------------|--------------------------------------------------------------------------------------------------------------------------------------------------------------------------------------------------------------------------------------------------------------------------------------------------------------------------------------------------------------------------------------------------------------------------------------------------------------------------------------------------------------------------------------------|--------------------------------------------------|
| <b>Study design</b>                     | 1 For each experiment, provide brief details of study design including: <ul style="list-style-type: none"> <li>a. The groups being compared, including control groups. If no control group has been used, the rationale should be stated.</li> <li>b. The experimental unit (e.g. a single animal, litter, or cage of animals).</li> </ul>                                                                                                                                                                                                 |                                                  |
| <b>Sample size</b>                      | 2 a. Specify the exact number of experimental units allocated to each group, and the total number in each experiment. Also indicate the total number of animals used.<br>b. Explain how the sample size was decided. Provide details of any <i>a priori</i> sample size calculation, if done.                                                                                                                                                                                                                                              |                                                  |
| <b>Inclusion and exclusion criteria</b> | 3 a. Describe any criteria used for including and excluding animals (or experimental units) during the experiment, and data points during the analysis. Specify if these criteria were established <i>a priori</i> . If no criteria were set, state this explicitly.<br>b. For each experimental group, report any animals, experimental units or data points not included in the analysis and explain why. If there were no exclusions, state so.<br>c. For each analysis, report the exact value of <i>n</i> in each experimental group. |                                                  |
| <b>Randomisation</b>                    | 4 a. State whether randomisation was used to allocate experimental units to control and treatment groups. If done, provide the method used to generate the randomisation sequence.<br>b. Describe the strategy used to minimise potential confounders such as the order of treatments and measurements, or animal/cage location. If confounders were not controlled, state this explicitly.                                                                                                                                                |                                                  |
| <b>Blinding</b>                         | 5 Describe who was aware of the group allocation at the different stages of the experiment (during the allocation, the conduct of the experiment, the outcome assessment, and the data analysis).                                                                                                                                                                                                                                                                                                                                          |                                                  |
| <b>Outcome measures</b>                 | 6 a. Clearly define all outcome measures assessed (e.g. cell death, molecular markers, or behavioural changes).<br>b. For hypothesis-testing studies, specify the primary outcome measure, i.e. the outcome measure that was used to determine the sample size.                                                                                                                                                                                                                                                                            |                                                  |
| <b>Statistical methods</b>              | 7 a. Provide details of the statistical methods used for each analysis, including software used.<br>b. Describe any methods used to assess whether the data met the assumptions of the statistical approach, and what was done if the assumptions were not met.                                                                                                                                                                                                                                                                            |                                                  |
| <b>Experimental animals</b>             | 8 a. Provide species-appropriate details of the animals used, including species, strain and substrain, sex, age or developmental stage, and, if relevant, weight.<br>b. Provide further relevant information on the provenance of animals, health/immune status, genetic modification status, genotype, and any previous procedures.                                                                                                                                                                                                       |                                                  |
| <b>Experimental procedures</b>          | 9 For each experimental group, including controls, describe the procedures in enough detail to allow others to replicate them, including: <ul style="list-style-type: none"> <li>a. What was done, how it was done and what was used.</li> <li>b. When and how often.</li> <li>c. Where (including detail of any acclimatisation periods).</li> <li>d. Why (provide rationale for procedures).</li> </ul>                                                                                                                                  |                                                  |
| <b>Results</b>                          | 10 For each experiment conducted, including independent replications, report: <ul style="list-style-type: none"> <li>a. Summary/descriptive statistics for each experimental group, with a measure of variability where applicable (e.g. mean and SD, or median and range).</li> <li>b. If applicable, the effect size with a confidence interval.</li> </ul>                                                                                                                                                                              |                                                  |

**Supplementary Table S1. Murine sepsis score.**

| Variable               | Score and description                                                                                                                                                                                                                                                                                                                                                                                                                   |
|------------------------|-----------------------------------------------------------------------------------------------------------------------------------------------------------------------------------------------------------------------------------------------------------------------------------------------------------------------------------------------------------------------------------------------------------------------------------------|
| Appearance             | 0: Coat is smooth<br>1: Patches of hair piloerected<br>2: Majority of back is piloerected<br>3: Piloerection may or may not be present, mouse appears "puffy"<br>4: Piloerection may or may not be present, mouse appears emaciated                                                                                                                                                                                                     |
| Level of consciousness | 0: Mouse is active<br>1: Mouse is active but avoids standing upright<br>2: Mouse activity is noticeably slowed. The mouse is still ambulant<br>3: Activity is impaired. Mouse only moves when provoked, movements have a tremor<br>4: Activity severely impaired. Mouse remains stationary when provoked, with possible tremor                                                                                                          |
| Activity               | 0: Normal amount of activity. Mouse is any of: eating, drinking, climbing, running, fighting<br>1: Slightly suppressed activity. Mouse is moving around bottom of cage<br>2: Suppressed activity. Mouse is stationary with occasional investigative movements<br>3: No activity. Mouse is stationary<br>4: No activity. Mouse experiencing tremors, particularly in the hind legs                                                       |
| Response to stimulus   | 0: Mouse responds immediately to auditory stimulus or touch<br>1: Slow or no response to auditory stimulus; strong response to touch (moves to escape)<br>2: No response to auditory stimulus; moderate response to touch (moves a few steps)<br>3: No response to auditory stimulus; mild response to touch (no locomotion)<br>4: No response to auditory stimulus. Little or no response to touch. Cannot right itself if pushed over |
| Eyes                   | 0: Open<br>1: Eyes not fully open, possibly with secretions<br>2: Eyes at least half closed, possibly with secretions<br>3: Eyes half closed or more, possibly with secretions<br>4: Eyes closed or milky                                                                                                                                                                                                                               |
| Respiration rate       | 0: Normal, rapid mouse respiration<br>1: Slightly decreased respiration (rate not quantifiable by eye)<br>2: Moderately reduced respiration (rate at the upper range of quantifying by eye)<br>3: Severely reduced respiration (rate easily countable by eye, 0.5 s between breaths)<br>4: Extremely reduced respiration (> 1 s between breaths)                                                                                        |
| Respiration quality    | 0: Normal<br>1: Brief periods of labored breathing<br>2: Labored, no gasping<br>3: Labored with intermittent gasps<br>4: Gasping                                                                                                                                                                                                                                                                                                        |

**Supplementary Table S2.** Quantitative real-time PCR primer sequences.

| Primers      |         | Sequences (5'–3')         |
|--------------|---------|---------------------------|
| <i>OCN</i>   | Forward | CCATCTTTCTTCGGGTTTTCA     |
|              | Reverse | CTTCTGGATCTATGTACGGCTCA   |
| <i>CLDN2</i> | Forward | TGAACACGGACCACTGAAAG      |
|              | Reverse | TTAGCAGGAAGCTGGGTCAG      |
| <i>CLDN4</i> | Forward | TTTTGTGGTCACCGACTTTG      |
|              | Reverse | TGTAGTCCCATAGACGCCATC     |
| <i>KIM1</i>  | Forward | GGTCTGTATTGTTGTCGAGTGG    |
|              | Reverse | CTTCTTGGAGGACGTGTGG       |
| <i>NGAL</i>  | Forward | CAGCTTTACGATGTACAGCACC    |
|              | Reverse | CAAATGTTCTGATCCAGTAGCG    |
| <i>PTGS2</i> | Forward | GCTTCAAACAGTTTCTCTACAACAA |
|              | Reverse | CATTTCTTCCCCCAGCAAC       |
| <i>HMOX1</i> | Forward | TGCTAGCCTGGTGCAAGATA      |
|              | Reverse | GCCAACAGGAAGCTGAGAGT      |
| <i>GAPDH</i> | Forward | TGTGTCCGTCGTGGATCTGA      |
|              | Reverse | CCTGCTTCACCACCTTCTTGA     |

*CLDN2*: claudin-2; *CLDN4*: claudin-4; *HMOX1*: heme oxygenase 1; *KIM1*: kidney injury molecule 1; *NGAL*: neutrophil gelatinase-associated lipocalin; *OCN*: occludin; *PTGS2*: prostaglandin-endoperoxide synthase 2.

**Supplementary Fig. S1.** Survival rate. Cecal ligation and puncture (CLP) under the conditions of 21-gauge, 1 cm ligation from the distal end of the cecum. Sham (n = 1) survived up to 72 h, and CLP mice (n = 9) had a 30% survival rate up to 72 h.

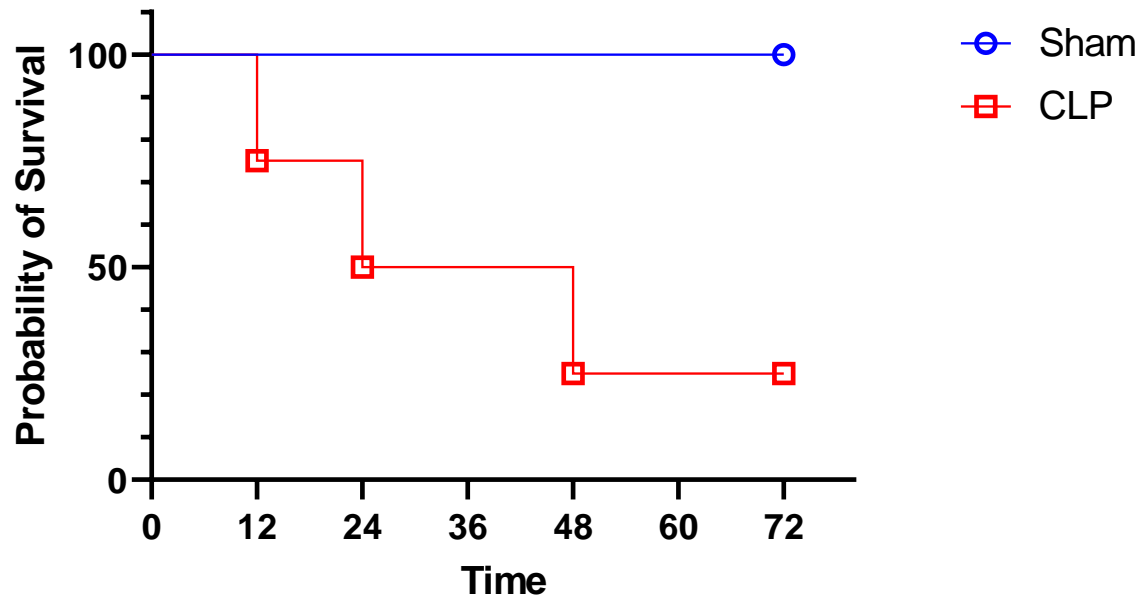

**Supplementary Fig. S2.** Time-dependent interleukin (IL)-6 level. Blood samples were collected from the tail at 1, 6, 12, 24, 48, and 72 h after cecal ligation and puncture (CLP) surgery, and IL-6 levels in the blood were measured using enzyme-linked immunosorbent assay. Compared with the sham model, IL-6 levels were significantly increased in the CLP model. IL-6 level measurements were stopped when CLP mice died. Conc.: concentration.

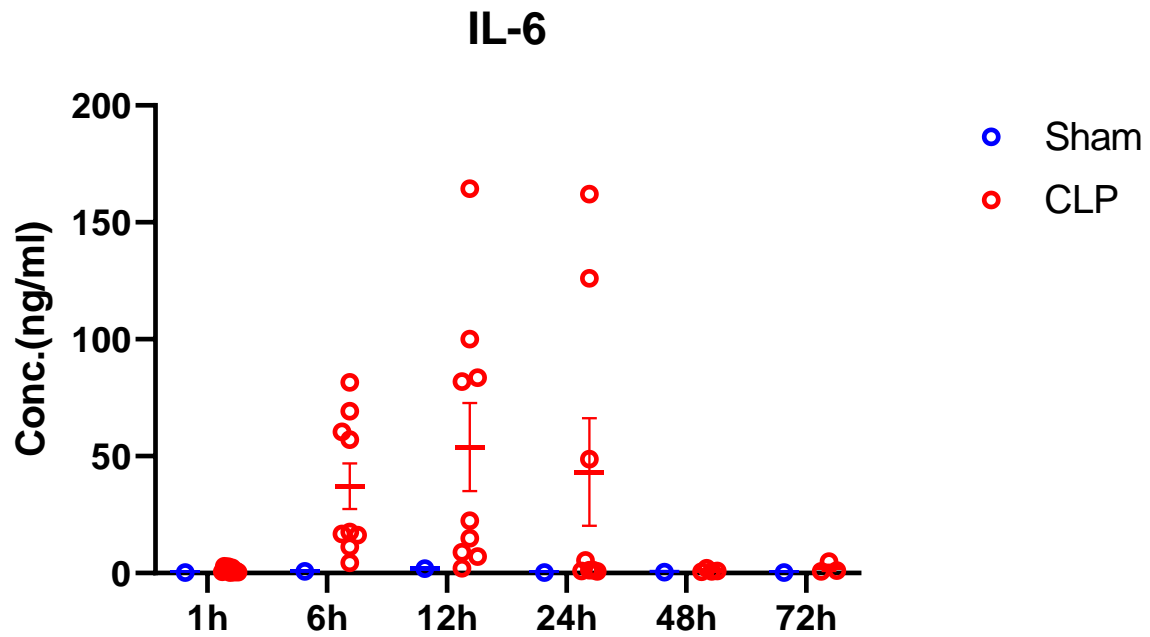

Supplementary Fig. S3. Full unedited gel images for Fig. 5D.

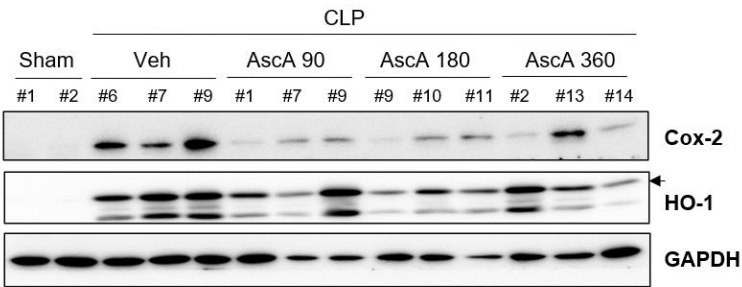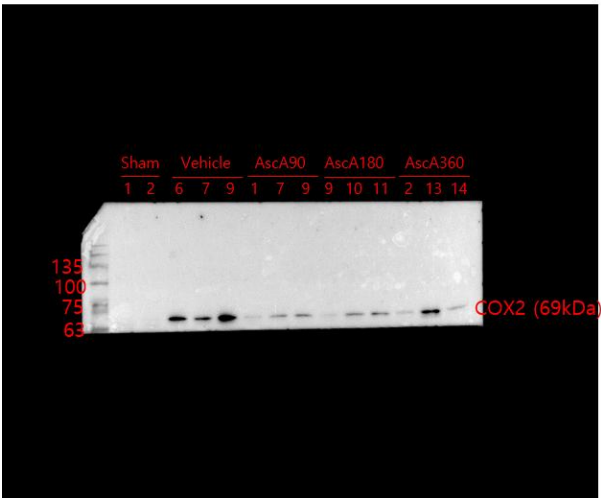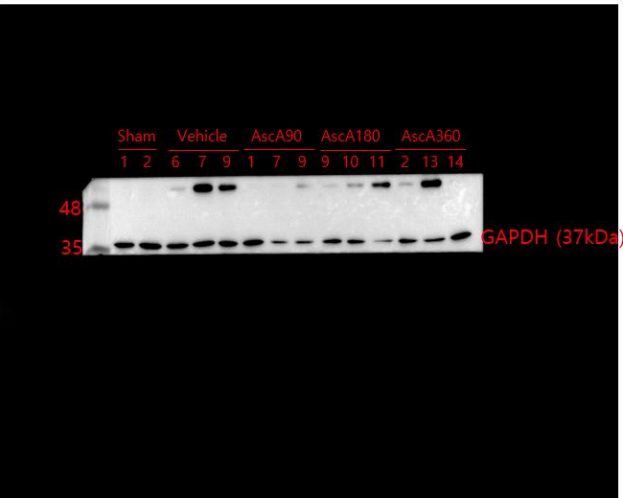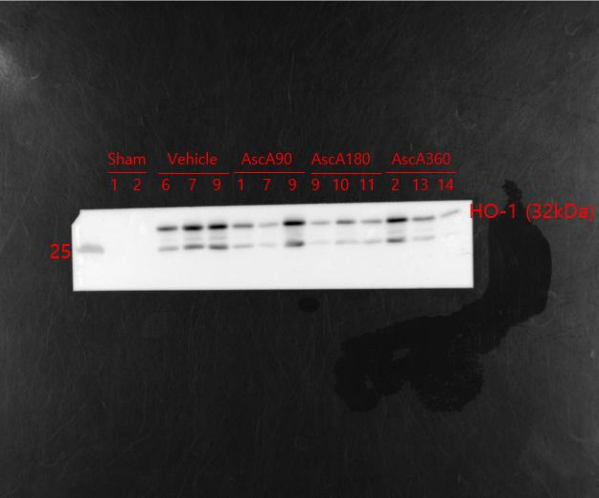

Supplement: MOESM1 [file 41598_2025_2622_MOESM1_ESM.pdf]
